# Supplementary material
Source: publisher site journal article supplement (https://www.degruyterbrill.com/publication/isbn/9783486592870/downloadAsset/9783486592870_Leseprobe.pdf)
Supplement: Supplementary file 1 [file 9783486592870_Leseprobe.pdf]

(1) *Prozessergebnisse*

Die Prozesse des Unternehmens folgen (logisch) aufeinander. In Abb. 1-4 liefert Prozess 1 Ergebnisse, mit denen in Prozess 2 weitergearbeitet wird. Prozess 2 stellt den notwendigen Input von Prozess 3 bereit. Welche Ergebnisse die Prozesse liefern müssen, wird insofern davon bestimmt, welche Folgeprozesse sich anschließen und wozu diese Ergebnisse in den Folgeprozessen verwendet werden.

Die mangelhafte Auseinandersetzung mit den Prozessen führt dazu, dass es kaum klare und verbindliche Absprachen darüber gibt, wie zu liefernde Prozessergebnisse auszusehen haben. Aufgrund dessen wissen die Mitarbeiter, die einen Prozess ausführen, oft nicht oder nur ungefähr, wozu die von ihnen bereitgestellten Prozessergebnisse eigentlich gebraucht werden. Die unmittelbare Folge ist, dass die Anforderungen der Empfänger der Prozessergebnisse nicht erfüllt werden und diese deshalb nicht zufrieden sind. Unter diesen Bedingungen ist ein reibungsloses Ineinandergreifen der Prozesse nicht möglich.

Die hiermit verbundene Problematik wird oft mit dem Bild von den geistigen Mauern zwischen den Abteilungen des Unternehmens veranschaulicht, über die alle Abteilungen ihre Arbeitsergebnisse werfen, ohne sich dafür zu interessieren, was mit diesen weiter geschieht.

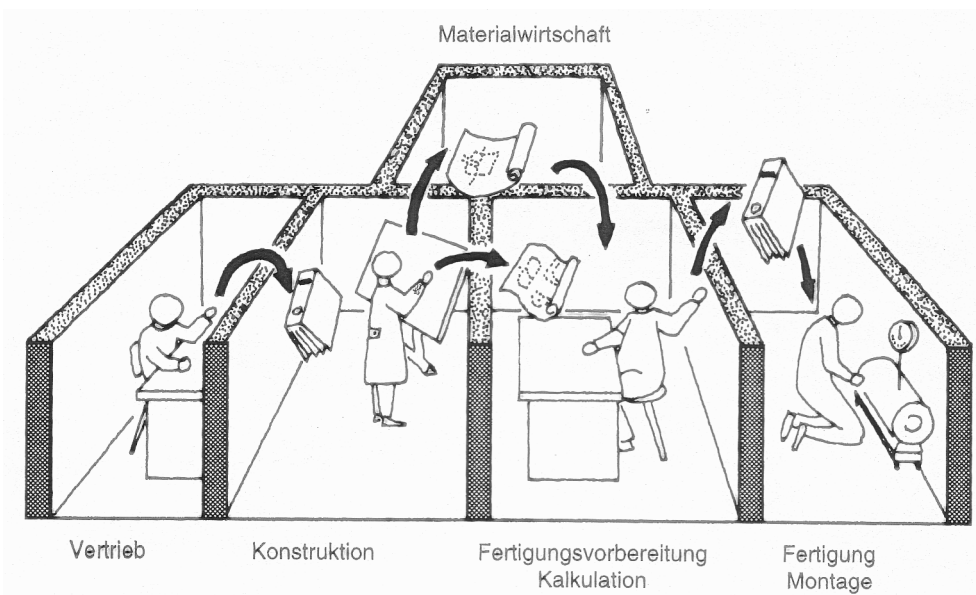

Abb. 1-5: Geistige Mauern zwischen den Abteilungen des Unternehmens (Ehrlenspiel 1995, S. 148)

Der Ressortegoismus, der in dem Bild von den Mauern zum Ausdruck kommt, besteht darin, dass jede beteiligte Organisationseinheit darum bemüht ist, die für sie geltenden Zielsetzungen möglichst gut auszuführen (im Vertrieb hohe Absatzzahlen, in der Fertigung eine hohe Auslastung der Betriebsmittel, im Einkauf günstige Beschaffungspreise usw.). Leider ist es nicht so, dass es auch für einen Prozess insgesamt das Beste ist, wenn jede der an ihm beteiligten Organisationseinheiten ihre Zielsetzungen möglichst konsequent verfolgt. Eher ist das Gegenteil der Fall. Der Grund dafür ist, dass die Interessen der Abteilungen teilweise gegen-

sätzlich sind. Wenn eine Abteilung ihre Belange erfolgreich durchsetzt, kann dies auf Kosten anderer Abteilungen gehen. Die Konsequenz für den Prozess ist, dass in seinem weiteren Verlauf ggf. für die anderen Abteilungen Schwierigkeiten entstehen und der Prozess insgesamt unzulänglich durchgeführt wird.

Ressortegoismus ist in einer funktionalen Aufbauorganisation aufgrund der Interessengegensätze zwischen den Abteilungen unvermeidbar. Eine unzureichende Auseinandersetzung mit den Prozessen führt dazu, dass die verschiedenartigen Interessen der an den Prozessen beteiligten Organisationseinheiten nicht erkannt und insofern auch nicht ausgeglichen werden können. Insofern wird auch nichts dafür getan, das Problem des Ressortegoismus zu vermindern.

### *(2) Prozessschritte*

Eine ganz wesentliche Folge mangelhafter Beschäftigung mit den Prozessen liegt darin, dass die Reihenfolge der Schritte, aus denen die Prozesse bestehen, nicht durchdacht ist, sondern sich im Laufe der Zeit irgendwie ergibt.

Die Folge der Prozessschritte ist deshalb oft ungünstig, teilweise werden überflüssige Prozessschritte durchgeführt, während auf der anderen Seite sinnvolle Schritte fehlen. Manchmal würden Prozessschritte besser in umgekehrter Reihenfolge stattfinden. Häufig werden Schritte nacheinander vollzogen, obwohl eine parallele Durchführung möglich wäre.

Aufgrund dieser Mängel werden die Prozessschritte nicht unbedingt so durchgeführt, dass die gewünschten Ergebnisse auf dem optimalen Weg erreicht werden. Die Prozesse sind stattdessen fehleranfällig, langsam und unnötig aufwendig.

### *(3) Informationstechnische Unterstützung*

Um Prozessschritte ausführen zu können, benötigen die Beteiligten Informationen. Eine optimale Ausführbarkeit der Prozesse setzt voraus, dass die benötigten Informationen vorhanden sind und rechtzeitig zur Verfügung stehen.

Die unzureichende Auseinandersetzung mit den Prozessen ist damit verbunden, dass die informationstechnische Unterstützung nicht gut auf die Prozesse abgestimmt ist und dadurch die Prozessdurchführung holperig und fehleranfällig wird. Beispiele dafür sind, dass Informationen im Prozessverlauf auf verschiedene Informationsträger gebracht werden müssen (z. B. von Papier auf elektronische Informationsträger), dass dieselben Daten mehrfach geführt werden (z. B. gleichzeitig in Listen und in einer Datenbank) oder dass bei aufeinanderfolgenden Prozessschritten miteinander nicht kompatible Hardwarekomponenten oder Softwareprodukte benutzt werden, sodass die Informationen manuell übertragen werden müssen.

Ein weiteres Grundproblem ist die nicht ausreichende Softwareunterstützung der Prozesse. Vielfach werden Informationen noch mit Papier und Bleistift erfasst, zusammengeführt und weitergegeben, obwohl es viel besser wäre, hierzu betriebswirtschaftliche Standardsoftware einzusetzen. Ist sich das Unternehmen seiner Prozesse nicht ausreichend bewusst, wird nicht erkannt, dass Softwareprodukte eingesetzt werden können, mit deren Hilfe die Prozesse leichter und besser durchgeführt werden können. Oft werden auch Softwarelösungen eingeführt, ohne zu bedenken, innerhalb welcher Prozesse sie angewandt werden sollen. Folge ist, dass die Softwareprodukte nicht zu den Prozessen passen und sich deshalb als ungeeignet erweisen.

#### (4) Verantwortlichkeiten

Es ist wichtig, dass für jeden Prozessschritt festgelegt ist, welche Organisationseinheit für dessen Ausführung zuständig ist. Wenn die Definition der Zuständigkeiten unterbleibt oder unklar ist, können sich verschiedene negative Konsequenzen ergeben.

In den meisten Fällen ist die Folge, dass der betreffende Prozessschritt nicht oder nicht immer ausgeführt wird. In anderen Fällen, z. B. wenn in dem Prozessschritt eine wichtige Entscheidung getroffen wird, kommt es bei unregelmäßigen Verantwortlichkeiten immer wieder zum Streit zwischen den Abteilungen bezüglich der Zuständigkeiten – eine Situation, die oft als Kompetenzgerangel bezeichnet wird.

Das wesentliche Problem bei der Festlegung der Verantwortlichkeiten liegt darin, wie die Zuordnung der Prozessschritte zu den Abteilungen vorgenommen werden soll. (Im Unterschied dazu ist die Zuordnung von Prozessschritten zu Stellen innerhalb der Abteilungen meistens ein geringeres Problem.) Denn die Verteilung der Verantwortlichkeiten ergibt sich weder vollständig noch immer zwingend aus den betriebswirtschaftlichen Funktionen. Sollen z. B. die bei der Herstellung von Produkten durchzuführenden Prüfungen von der Entwicklungs- oder von der Fertigungsabteilung festgelegt werden? Sollen die Materialien, die für die Produktion gebraucht werden, von der Fertigungs- oder von der Einkaufsabteilung bestellt werden? Soll für die Beurteilung, ob eine Kundenbeschwerde berechtigt ist, die Vertriebs-, die Entwicklungs- oder die Fertigungsabteilung zuständig sein?

Wenn die Prozesse sich selbst überlassen werden, bleiben diese Fragen ungeklärt.

#### (5) Prozessschnittstellen

An einer Prozessschnittstelle wird innerhalb eines Prozesses der betreffende Vorgang von einer Abteilung zu einer anderen weitergegeben. Innerhalb der funktionalen Aufbauorganisation ist jede Abteilung dafür verantwortlich, dass die Teilprozesse ausgeführt werden, die in ihren Zuständigkeitsbereich fallen. Es gibt jedoch keine Organisationseinheit, die für die Koordination der von den verschiedenen Abteilungen ausgeführten Prozessschritte verantwortlich ist und die dafür zu sorgen hat, dass ein Prozess insgesamt zu vernünftigen Ergebnissen führt.

Dies kann innerhalb der Prozesse v. a. an den Schnittstellen zum Problem werden, an denen der Stab an eine andere Abteilung weitergegeben wird, die dann für die Folgeschritte zuständig ist. An diesen Schnittstellen entstehen leicht Verzögerungen und Missverständnisse, so dass die Prozesse insgesamt nicht optimal durchgeführt werden.

#### **Größere Bedeutung des Prozessgedankens**

Die beschriebenen Defizite, die eine Vernachlässigung der Prozesse mit sich bringt, sind in der betrieblichen Praxis etwa seit Beginn der 90er-Jahre weithin bekannt. Auch wenn aufgrund der Interessen der Abteilungsleiter die Beschäftigung mit der Aufbauorganisation nach wie vor dominiert, findet in den Betrieben eine mehr oder weniger intensive Auseinandersetzung mit den Prozessen statt.

Der wesentliche Grund dafür ist – wie für so vieles – der Wandel vom Verkäufer- zum Käufermarkt. In der guten alten Zeit des Verkäufermarkts waren ungenügend beherrschte betriebliche Prozesse noch tolerierbar. Unter Marktbedingungen hingegen, bei denen die Be-

triebe einem enormen Wettbewerbsdruck ausgesetzt sind und um jeden Kunden kämpfen müssen, können sich die Unternehmen unsichere Prozesse nicht mehr leisten.

Darüber hinaus haben weitere voneinander weitgehend unabhängige Entwicklungen in den Bereichen Wirtschaftsinformatik, betriebliche Kostenrechnung und Qualitätsmanagement dazu geführt, dass sich die Unternehmen stärker für ihre Prozesse interessieren:

- Der betriebliche Einsatz von Softwareprodukten bezieht sich nicht mehr nur auf einzelne Tätigkeiten und kurze Arbeitsabläufe. Mit betriebswirtschaftlicher Standardsoftware wird das Ziel verfolgt, abteilungsübergreifende betriebliche Prozesse durchgängig mit Informationstechnik zu unterstützen (Kap. 2.6). Daraus ergibt sich zwangsläufig, dass stärker darüber nachgedacht werden muss, welche Prozesse im Unternehmen es gibt und wie diese verlaufen.
- In der traditionellen Kostenrechnung werden die Gemeinkosten über Zuschlagsätze auf die Produkte und Dienstleistungen verteilt. Seit ca. zwei Jahrzehnten ist bekannt, dass auf diese Weise kein realistisches Bild der Kosten erreicht werden kann. Die Prozesskostenrechnung sucht dieses Problem zu lösen, indem die Kosten für die Prozesse ermittelt werden, die zur Erstellung der Produkte und Dienstleistungen durchzuführen sind. Die Ermittlung der Prozesskosten setzt ebenfalls voraus, dass die betrieblichen Prozesse identifiziert und analysiert werden.
- Mit Qualitätsmanagement soll erreicht werden, dass das Unternehmen fehlerfreie Produkte und Dienstleistungen erstellt, die den Kundenanforderungen entsprechen. Früher ging man davon aus, dass Qualitätsmanagementmaßnahmen neben und zusätzlich zu den betrieblichen Tätigkeiten durchzuführen sind. In den 90er-Jahren setzte sich die Erkenntnis durch, dass fehlerhafte und unzureichende betriebliche Leistungen in den meisten Fällen auf Mängel in den betrieblichen Prozessen zurückzuführen sind und insofern stabile und sichere Prozesse die wesentliche Voraussetzung für Qualität sind (DIN ISO 9001 2000; DIN ISO 9004 2000). Diese Entwicklung im Qualitätsmanagement hat gleichfalls das Interesse an den betrieblichen Prozessen gefördert.

Auch in der betriebswirtschaftlichen Organisationslehre ist die Bedeutung der Prozesse mittlerweile unumstritten. Die entscheidenden Impulse kamen Anfang der 90er-Jahre von amerikanischen Unternehmensberatungen mit dem Konzept des Business Process Reengineering. Das wesentliche Kennzeichen dieses Managementkonzepts ist, dass die betrieblichen Prozesse als „die wichtigste Dimension der Organisationsgestaltung“ angesehen werden (Wirtz 1996, S. 1024). Den Unternehmensberatungen gelang es, das Business Process Reengineering-Konzept sehr erfolgreich zu vermarkten, sodass in den 90er-Jahren in vielen Betrieben entsprechende Beratungsprojekte durchgeführt wurden.

Die vom Business Process Reengineering geforderte Vorgehensweise kommt in dem Titel des Standardwerks von M. H. Hammer und J. C. Champy ‚Business Reengineering. Die Radikalkur für das Unternehmen‘ gut zum Ausdruck (Hammer/Champy 1996). Es wird davon ausgegangen, dass sich das Unternehmen von seinen bisherigen Abteilungen und Abläufen völlig verabschieden und ganz von vorne anfangen müsse, um sich von Grund auf neu aufzubauen und seine Prozesse so gestalten zu können, dass sie ihrem Idealzustand entsprechen. Unternehmen, die zu einem solchen grundlegenden Neuanfang bereit sind, könnten – so wurde behauptet – ihre Wettbewerbsfähigkeit „in Größenordnungen“ verbessern (ebd., S. 48).

Bei den von den Unternehmensberatungen in den 90er-Jahren betreuten Business Process Reengineering-Projekten konnten diese weitgehenden Versprechungen allerdings nicht eingelöst werden. Es gab mehr Projekte, die fehlschlagen als erfolgreich waren (Wirtz 1996). Der Hauptgrund dafür ist, dass es praktisch nie möglich und auch nicht sinnvoll ist, mit einem Schlag die bestehende Organisation zu beseitigen und das Unternehmen auf der ‚grünen Wiese‘ neu zu erfinden. Aus diesem Grund werden Business Process Reengineering-Projekte in der in den 90er-Jahren propagierten Form heute nicht mehr durchgeführt.

Die bleibende Veränderung, die Business Process Reengineering bewirkt hat, besteht darin, dass der Prozessgedanke in den Unternehmen und in der Betriebswirtschaftslehre eine enorme Verbreitung gefunden hat und damit sehr populär geworden ist. Mittlerweile spielen die betrieblichen Prozesse in allen modernen Managementkonzepten eine tragende Rolle. Ganz gleich, ob man als Beispiele Konzepte wie Total Quality Management, Lean Management, Balanced Scorecard, Supply Chain Management oder E-Business nimmt, man wird stets feststellen, dass alle diese Ansätze prozessorientiert ausgerichtet sind. Auch wenn sich die Konzepte mit dem Prozessthema jeweils aus verschiedener Perspektive befassen und hierbei zu unterschiedlichen (teilweise auch gegensätzlichen) Handlungsempfehlungen kommen, kann man davon sprechen, dass die Betrachtung der betrieblichen Prozesse einen gemeinsamen Kern heutiger Managementkonzeptionen ausmacht.

Diese Entwicklung wird von H.-C. Riekhof wie folgt zusammengefasst: „Eine in ihrer Tragweite gar nicht hoch genug einzuschätzende Idee, die sich in allen Managementkonzeptionen wiederfindet, ist die Idee des Geschäftsprozesses, die die heutigen Denkweisen und Auffassungen von Organisationsstrukturen radikal infrage stellt: Nicht mehr Strukturen oder Ergebnisse sind das Ziel von Gestaltungsüberlegungen, sondern vor allem Prozesse stehen im Fokus aller Betrachtungen.“ (Riekhof 1997, S. 9f.)

### **Prozessorganisation vor Aufbauorganisation?**

Aufgrund der gewachsenen Bedeutung des Prozessgedankens vertreten in der betriebswirtschaftlichen Organisationslehre mittlerweile viele Autoren die Position, die funktionale Aufbauorganisation habe ausgedient und müsse durch eine prozessorientierte Aufbauorganisation ersetzt werden. Wurden in der Vergangenheit die betrieblichen Abläufe als Nebenprodukt der Aufbauorganisation angesehen, solle nun genau umgekehrt vorgegangen werden: Zunächst gelte es, die Prozesse zu definieren und anschließend eine dazu passende Aufbauorganisation zu finden (Osterloh/Frost 2006, S. 111; Schmelzer/Sesselmann 2006, S. 68f.).

Bei einer prozessorientierten Aufbauorganisation sind die Prozesse (und nicht die betriebswirtschaftlichen Funktionen) das entscheidende Kriterium, um die Abteilungen zu definieren. „Bei der Bildung von Organisationseinheiten heißt es, einen gesamten Prozess vorrangig einer Organisationseinheit zuzuordnen.“ (Kugeler/Vieting 2005, S. 223)

*Beispiel:* Ein technischer Dienstleister installiert Anlagen und führt regelmäßige Wartungstätigkeiten durch. Bei einer prozessorientierten Aufbauorganisation gibt es in diesem Unternehmen (u. a.) die beiden Abteilungen ‚Neuinstallationen‘ und ‚Wartung‘. Diese sind für die entsprechenden Prozesse komplett zuständig und verfügen über alle dafür notwendigen Ressourcen (Abb. 1-6).

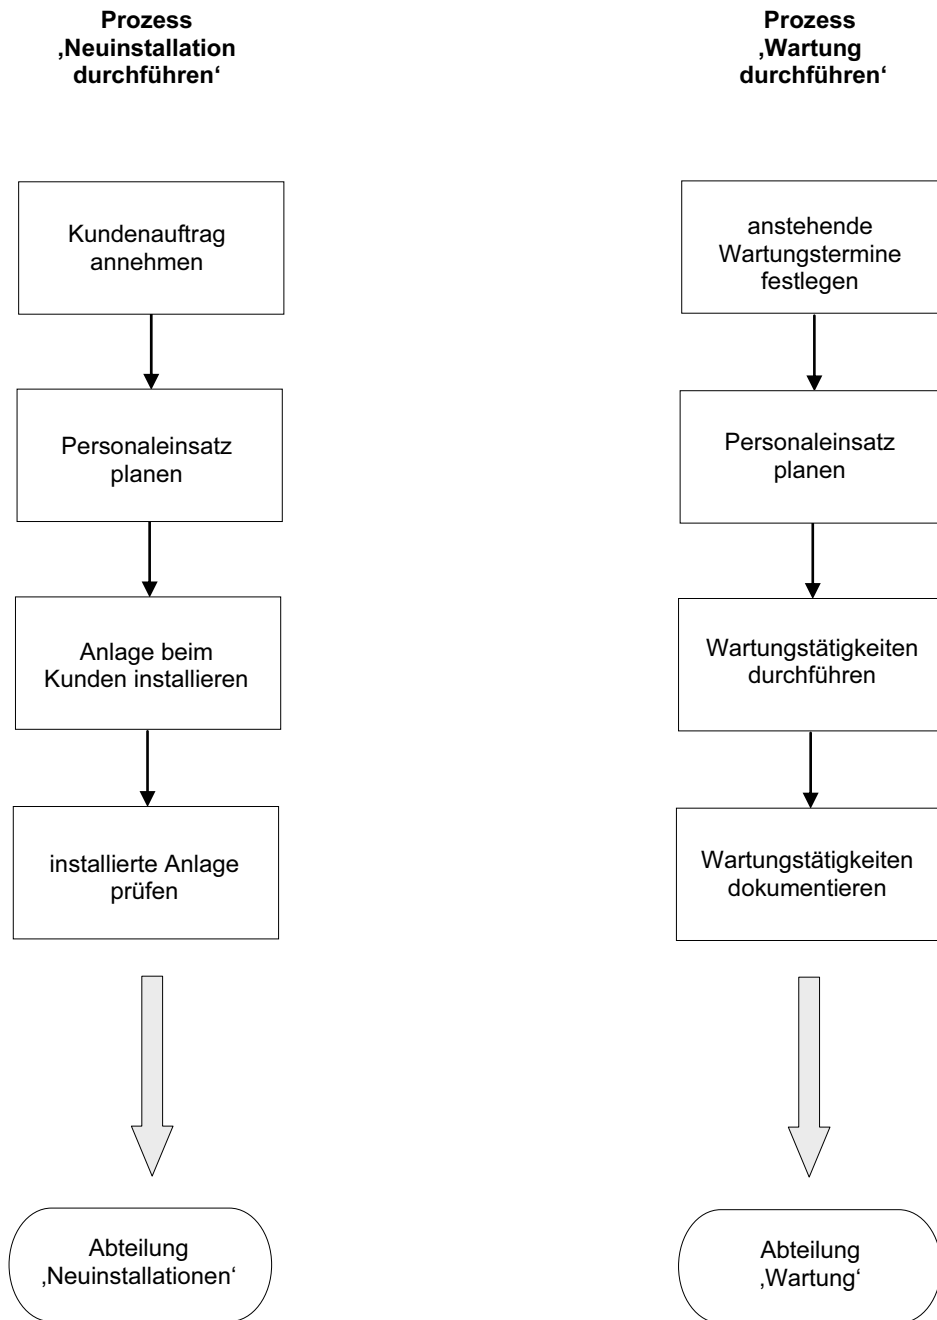

Abb. 1-6: Zuordnung kompletter Prozesse zu Abteilungen in einer prozessorientierten Aufbauorganisation (Beispiel technischer Dienstleister)

Die Idee der prozessorientierten Aufbauorganisation wirkt zunächst bestechend, löst sie doch auf einen Schlag alle (oben beschriebenen) Schwierigkeiten, die mit abteilungsübergreifenden Prozessen in einer funktionalen Aufbauorganisation verbunden sind: Das Problem des Ressortegoismus erledigt sich, da Abteilungs- und Prozessziele identisch sind. Die Verantwortung für die Gesamtprozesse ist klar geregelt. Es gibt innerhalb der Prozesse keine Übergänge zwischen den Abteilungen, sodass es nicht zu den für die funktionale Aufbauorganisation typischen Schnittstellenproblemen kommen kann. Alle Prozessschritte finden innerhalb einer Abteilung statt, was die Festlegung einer effizienten Reihenfolge der Prozessschritte ungemein erleichtert.

Angesichts dieser Argumente wird jedoch vergessen, dass die funktionale Aufbauorganisation dem Unternehmen nicht nur Nachteile, sondern auch enorme Vorteile bringt. Es kommt nicht von ungefähr, dass die Aufbauorganisation der weitaus meisten Unternehmen nach wie vor funktional ausgerichtet ist und dass sich bisher nur wenige Unternehmen dazu haben durchringen können, diese durch eine prozessorientierte Aufbauorganisation zu ersetzen.

Die Vorteile der funktionalen Aufbauorganisation ergeben sich aus der mit ihr möglichen Spezialisierung und der dadurch erreichbaren effizienten Nutzung von Ressourcen. Denn die Ausführung der verschiedenen Prozessschritte innerhalb der Prozesse erfordert in vielen Fällen besondere Kompetenzen, Betriebsmittel oder spezielle Materialien. Häufig werden in verschiedenen Prozessen Prozessschritte durchgeführt, die auf die Nutzung gleichartiger Ressourcen angewiesen sind. In einer funktionalen Organisation werden alle derartigen Prozessschritte denjenigen Abteilungen zugeordnet, in denen diese Ressourcen vorhanden sind. Auf diese Weise werden die Ressourcen optimal ausgelastet.

*Beispiel:* Ist der o. g. technische Dienstleister funktional organisiert, wird es in diesem Unternehmen (u. a.) die Abteilungen ‚Auftragsabwicklung‘ und ‚technischer Service‘ geben. Beide Abteilungen sind jeweils für bestimmte Schritte innerhalb der beiden Prozesse zuständig. Wie aus Abb. 1-7 hervorgeht, ist die Abteilung ‚Auftragsabwicklung‘ bei beiden Prozessen dafür verantwortlich, aufgrund eingegangener Kundenaufträge bzw. anstehender Wartungstermine die Personaleinsatzplanung vorzunehmen, während die Abteilung ‚technischer Service‘ jeweils für die technische Ausführung zuständig ist.

Diese Zuordnung hat den Nachteil, dass bei beiden Prozessen jeweils zwischen dem 2. und 3. Prozessschritt eine Prozessschnittstelle entsteht, an der die Zuständigkeit von der einen auf die andere Abteilung übergeht.

Der Vorteil besteht jedoch darin, dass hierdurch eine gute Nutzung der personellen Ressourcen möglich wird. Die Installation und die Wartung werden von Mitarbeitern vorgenommen, die dieselben technischen Kompetenzen haben. Wenn die Personaleinsatzplanung von derselben Abteilung vorgenommen wird, können diese Mitarbeiter optimal ausgelastet werden. Z. B. ist es möglich, Wartungstermine vorzuziehen, wenn bezüglich der Neuinstallationen einmal nicht so viel zu tun ist. Ein solcher Ausgleich ist jedoch nicht möglich, wenn die beiden Prozesse unterschiedlichen Abteilungen zugeordnet sind, die jeweils über eigene personelle Ressourcen verfügen und diese unabhängig voneinander verplanen.

In einer prozessorientierten Aufbauorganisation ist es nicht vorgesehen, dass dieselben Ressourcen von verschiedenen Prozessen genutzt werden. Dies führt häufig dazu, dass die Ressourcen nicht so optimal genutzt werden, wie dies möglich wäre. Insofern besteht zwischen

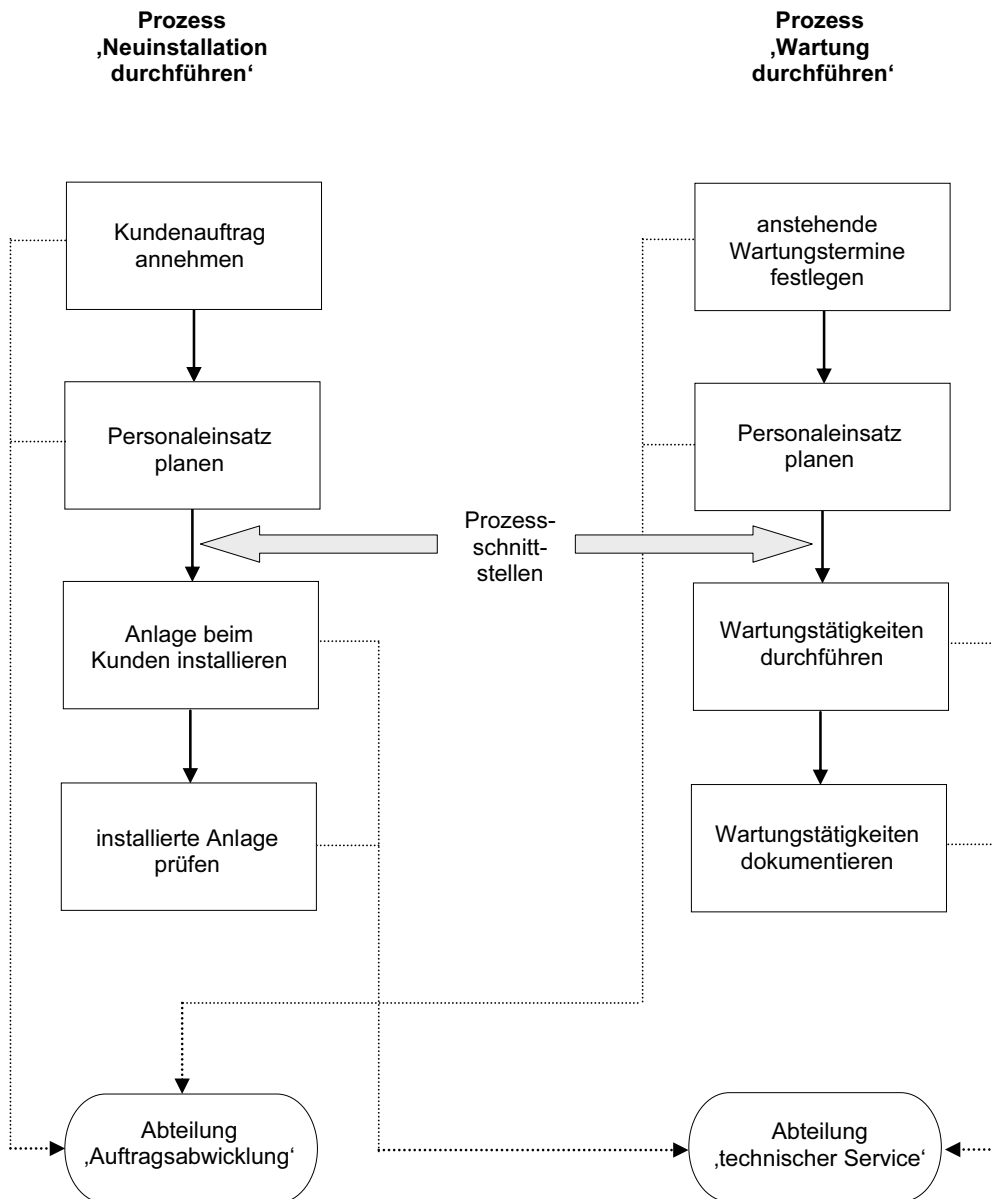

Abb. 1-7: Zuordnung von Prozessschritten zu Abteilungen in einer funktionalen Aufbauorganisation (Beispiel technischer Dienstleister)

der Prozessorientierung und dem effizienten Umgang mit Ressourcen ein Zielkonflikt (Mertens 1997, S. 110).

Nach der Meinung des Autors kann man allgemein nicht sagen, ob eine funktionale oder eine prozessorientierte Aufbauorganisation besser ist.



- Entscheidet sich ein Unternehmen für eine (eher) funktionale Aufbauorganisation, nutzt es den mit der Spezialisierung verbundenen Vorteil, dass die Ressourcen besser ausgelastet werden. Es wird jedoch mit dem Problem zu kämpfen haben, dass die über die Abteilungsgrenzen hinweglaufenden Prozesse schwerer zu steuern sind.
- Wählt ein Unternehmen hingegen eine (eher) prozessorientierte Aufbauorganisation, können innerhalb der Abteilungen schöne, elegante Prozesse definiert und durchgeführt werden – allerdings um den Preis einer nicht immer optimalen Auslastung von Ressourcen.

Um eine Lösung zu finden, müssen die beiden Formen der Aufbauorganisation im Einzelfall gegeneinander abgewogen werden. M. Rebstock hat recht, wenn er betont, „dass es sich bei der Frage Prozessorientierung versus Funktionsspezialisierung in der Regel nicht um ein Entweder-oder handelt, sondern dass eine konkrete organisatorische Lösung auf einem Punkt des *Kontinuums* zwischen den beiden Extremen anzusiedeln ist.“ (Rebstock 1997, S. 274)
